# Supplementary material for: Applying Behavioral Theory to Increase Mindfulness Practice Among Adolescents: an Exploratory Intervention Study Using a Within-Trial RCT Design
Source: Springer Nature journal article supplement (doi:10.1007/s12671-018-0976-2), 2018-07-09
Supplement: MOESM1 [file 15930752]

# Making Positive Changes

We all want life to be satisfying and go smoothly. However, it doesn't always go according to plan, and even when life is good, things can always be better. In some situations, mindfulness techniques might help smooth over rough patches or make life more satisfying and enjoyable.

Below (on the left) is a list of ways that we can improve our lives, and (on the right) is a list of mindfulness techniques that could potentially be used to achieve some of these improvements. There are also some blank spaces on each side so that you can add your own.

Take a moment now to choose 1 or 2 improvements you might like to or need to make at some point in your life, and connect them with a line to a mindfulness exercise that might help you achieve this improvement. You can take this sheet with you as a reminder of your positive change plan.

Social

- Concentrate better on my hobbies
- Feel energized
- Be less stressed
- Get along better with my family
- 

Coping

- Manage stress better
- Accept who I am more
- Get better grades on exams
- Feel happier
- 

Acceptance

- Feel safe
- Cope better with a difficult emotion (e.g., fear, aggression, anxiety)
- Understand my emotions better
- 
- 

Positive Emotions

- Accept my feelings
- Get along better with my friends
- Feel more calm
- Sleep better
- 

- Concentrate better in class
- Get frustrated less easily
- Accept my thoughts
- Be more optimistic
- 

Focus

- Feel less worried about future
- Accept who I am more
- Focus Better
- Feel more resilient
- 

Other

- Feel less confused
- Understand my emotions better
- 
- 
- 

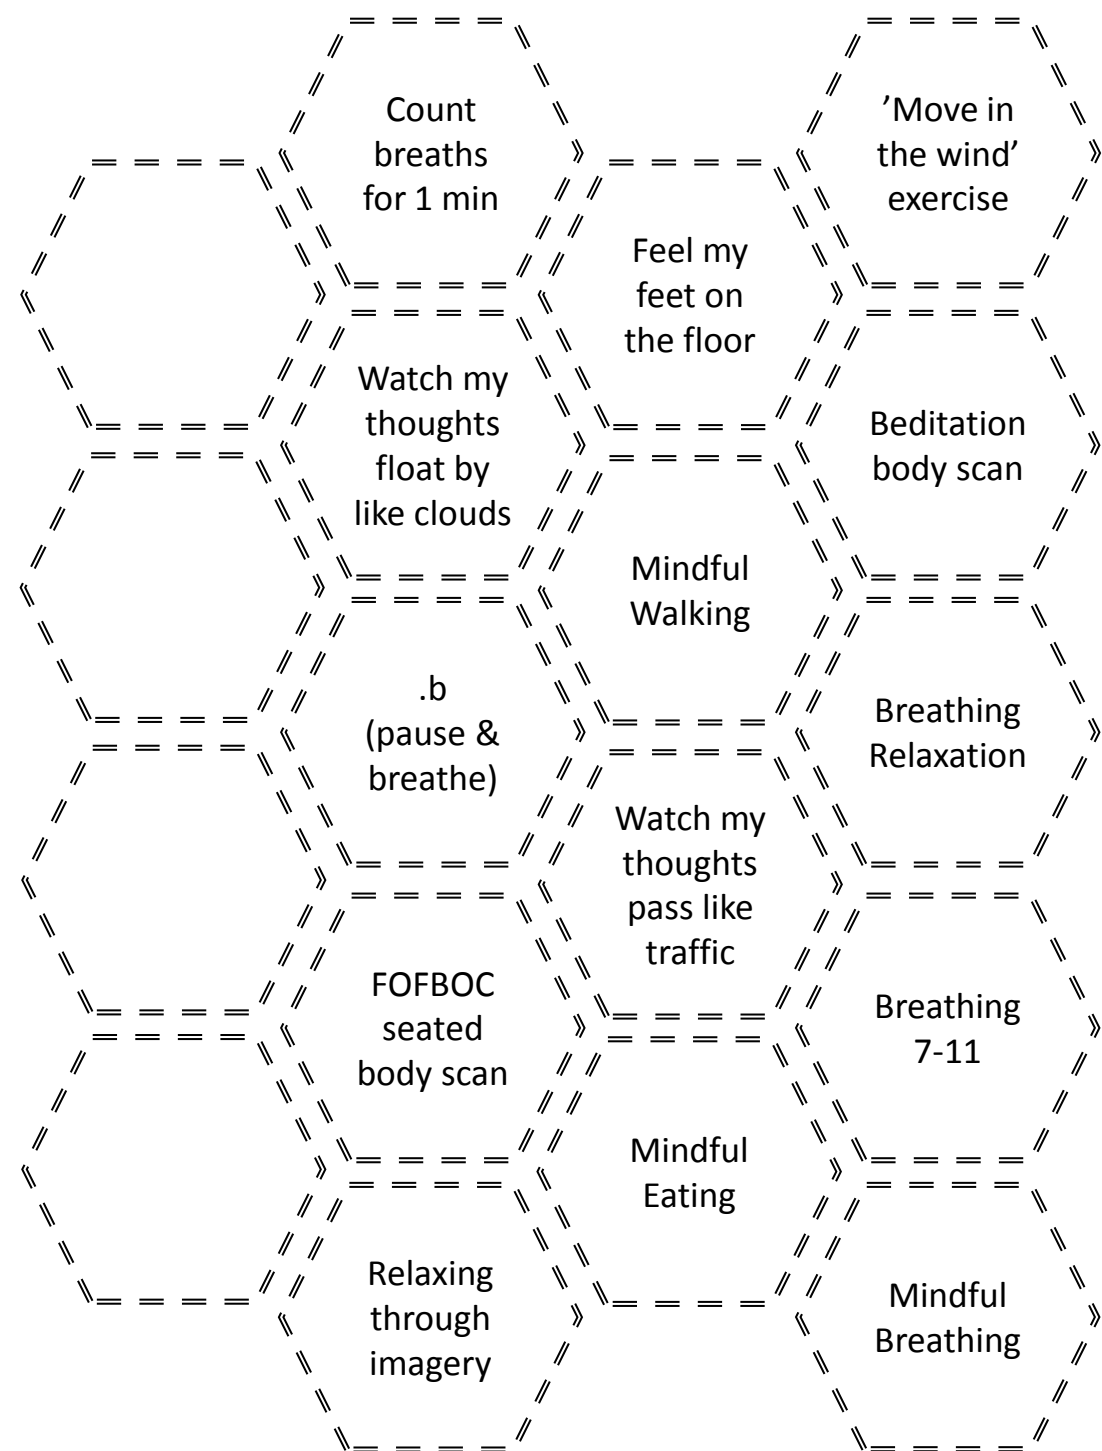

# Myönteisten Muutosten Tekeminen

Haluamme kaikki elämän olevan mukavaa ja miellyttävää. Asiat eivät kuitenkaan aina mene suunnitelmien mukaisesti ja silloinkin kun elämä on hyvin, asiat voivat aina olla paremmin. Joissain tilanteissa tietoisien läsnäolon harjoitukset saattavat auttaa ylittämään vaikeuksia ja tekemään elämästä merkityksellisempää ja nautinnollisempaa.

Alla (vasemmalla) on lueteltu myönteisiä päämääriä, ja (oikealla) lista tietoisien läsnäolon harjoituksista, joita voimme käyttää saavuttaaksemme näitä myönteisiä päämääriä.

Valitse nyt ympyröimällä vasemmanpuolisesta listasta 1-2 sinulle tärkeintä päämäärää, joihin haluaisit myönteisen muutoksen, ja yhdistä ne viivalla tietoisien läsnäolon harjoitukseen (oikealla), joka voi auttaa sinua aikaansaamaan haluamasi muutoksen. Ota tämä paperi mukaasi ja laita se halutessasi huoneesi seinälle muistutukseksi.

## Jos haluan...

|             |                                             |                                                                                |                                    |                                               |                           |
|-------------|---------------------------------------------|--------------------------------------------------------------------------------|------------------------------------|-----------------------------------------------|---------------------------|
| Social      | Keskittyä paremmin harrastuksissa           | Olla energisempi                                                               | Vähentää stressiä                  | Tulla paremmin toimeen perheenjäsenten kanssa |                           |
| Coping      | Hallita paremmin stressiä                   | Hyväksyä itseni paremmin                                                       | Saada parempia arvosanoja kokeissa | Luottaa siihen, että asiat sujuvat hyvin      |                           |
| Hyväksyntä  | Tuntea oloni turvalliseksi                  | Tulla paremmin toimeen vaikean tunteen kanssa (esim. viha, pelko tai ahdistus) | Hyväksyä tunteeni                  | Sietää veemäisiä tunteita paremmin            |                           |
| Hyvä fiilis | Hyväksyä tunteeni                           | Tulla paremmin toimeen kavereiden kanssa                                       | Olla rauhallinen                   | Nukkua paremmin                               |                           |
| Focus       | Keskittyä paremmin tehtäviini koululuokassa | Tuntea oloni vähemmän turhautuneeksi                                           | Hyväksyä ajatukseni                | Olla onnellinen                               |                           |
| Muuta       | Huolehtia vähemmän                          | Hyväksyä itseni paremmin                                                       | Keskittyä paremmin                 | Olla lannistumatta ongelmien edessä           | Olla vähemmän hämmentynyt |

## ...niin teen näitä harjoituksia:

|                                        |                                     |                             |
|----------------------------------------|-------------------------------------|-----------------------------|
| Count breaths for 1 min                | Feel my feet on the floor           | 'Move in the wind' exercise |
| Watch my thoughts float by like clouds | Mindful Walking                     | Beditation body scan        |
| .b (pause & breathe)                   | Watch my thoughts pass like traffic | Breathing Relaxation        |
| FOFBOC seated body scan                | Mindful Eating                      | Breathing 7-11              |
| Relaxing through imagery               | Mindful Breathing                   |                             |

Hajoilla vähemmän / Olla paremmalla tuulella / **Saada parempia urheilutuloksia** / **Onnistua paremmin treeneissä** / Olla vähemmän väsynyt / Laiskotella vähemmän / Jaksaa paremmin / **Olla vähemmän ärtyisiä** / **Sietää paremmin ärsyttäviä tilanteita** / Tuntea oloni vahvemmaksi / **Märehtiä tunteitani vähemmän** /
