# Supplementary material for: Applying Behavioral Theory to Increase Mindfulness Practice Among Adolescents: an Exploratory Intervention Study Using a Within-Trial RCT Design
Source: Springer Nature journal article supplement (doi:10.1007/s12671-018-0976-2), 2018-07-09
Supplement: MOESM2 [file 15930752]

Mindfulness Benefits Used in the Card Activity (Color-coded by similarity)

| English                                                                   | Suomeksi (In Finnish)                                                                |
|---------------------------------------------------------------------------|--------------------------------------------------------------------------------------|
| 1. Concentrate better while in class                                      | 1. Keskittymään paremmin tehtäviini koululuokassa                                    |
| 2. Concentrate better on my hobbies                                       | 2. Keskittymään paremmin harrastuksissa                                              |
| 3. Manage stress better                                                   | 3. Hallitsemaan paremmin stressiä                                                    |
| 4. Cope better with a difficult emotion (e.g., fear, aggression, anxiety) | 4. Tulemaan paremmin toimeen vaikean tunteen kanssa (esim. viha, pelko tai ahdistus) |
| 5. Sleep better                                                           | 5. Nukkumaan paremmin                                                                |
| 6. Get better grades in exams                                             | 6. Saamaan parempia arvosanoja kokeissa                                              |
| 7. Get along better with my friends                                       | 7. Tulemaan paremmin toimeen kavereiden kanssa                                       |
| 8. Get along better with family members                                   | 8. Tulemaan paremmin toimeen perheenjäsenten kanssa                                  |
| 9. Feel less disillusioned with life                                      | 9. Pettymään harvemmin                                                               |
| 10. Feel less threatened                                                  | 10. Tuntemaan oloni vähemmän uhatuksi                                                |
| 11. Feel less confused                                                    | 11. Olemaan vähemmän hämmentyneeksi                                                  |
| 12. Feel less tired                                                       | 12. Tuntemaan oloni vähemmän väsyneeksi                                              |
| 13. Feel resilient                                                        | 13. Olemaan lannistumatta ongelmien edessä.                                          |
| 14. Feel less frustrated                                                  | 14. Tuntemaan oloni vähemmän turhautuneeksi                                          |
| 15. Focus better                                                          | 15. Keskittymään paremmin                                                            |
| 16. Feel less jealous                                                     | 16. Tuntemaan oloni vähemmän mustasukkaiseksi                                        |
| 17. Feel less anxious over the future                                     | 17. Huolehtimaan vähemmän tulevaisuudesta                                            |
| 18. Feel less worried                                                     | 18. Huolehtimaan vähemmän                                                            |
| 19. Feel calm                                                             | 19. Olemaan rauhallinen                                                              |
| 20. Feel happy                                                            | 20. Olemaan onnellinen                                                               |
| 21. Understand my emotions better                                         | 21. Ymmärtämään tunteitani paremmin                                                  |
| 22. Accept my self better                                                 | 22. Hyväksymään itseni paremmin                                                      |
| 23. Accept my feelings                                                    | 23. Hyväksymään tunteeni                                                             |
| 24. Accept my thoughts                                                    | 24. Hyväksymään ajatukseni                                                           |
| 25. Be more optimistic                                                    | 25. Olemaan optimistisempi                                                           |
| 26. Be more kind towards my self                                          | 26. Olemaan lempeämpi itseäni kohtaan                                                |

|                                                   |                                                     |
|---------------------------------------------------|-----------------------------------------------------|
| 27. Tolerate better my own flaws and inadequacies | 27. Sietämään paremmin vikojani ja heikkouksiani    |
| 28. Let go of the past                            | 28. Päästämään irti menneisyydestä                  |
| 29. Feel more self-confident                      | 29. Olemaan itsevarmempi                            |
| 30. feel less lonely                              | 30. Tuntemaan oloni vähemmän yksinäiseksi           |
| 31. Feel optimistic about the future              | 31. Olemaan optimistinen tulevaisuuden suhteen      |
| 32. Cope better in difficult situations           | 32. Hallitsemaan paremmin vaikeat tilanteet         |
| 33. Reduce stress                                 | 33. Vähentämään stressiä                            |
| 34. Stay calm in stressful situations             | 34. Pysymään rauhallisena stressaavissa tilanteissa |
| 35. Feel safe                                     | 35. Tuntemaan oloni turvalliseksi                   |
| 36. Feel more energetic                           | 36. Olemaan energisempi                             |
| 37. Feel content and happy with my life           | 37. Olemaan tyytyväinen ja onnellinen               |
| 38. Have more clarity                             | 38. Tuntemaan oloni selkeämmäksi                    |
| 39. Other?                                        | 39. Johonkin muuhun, mihin?                         |
